# Supplementary material for: Analysis of Industrial Bacillus Species as Potential Probiotics for Dietary Supplements
Source: MDPI journal article supplement (doi:10.3390/microorganisms11020488), 2023-02-16
Supplement: s1 [file s1]

# Supplementary Figures S5 A-E

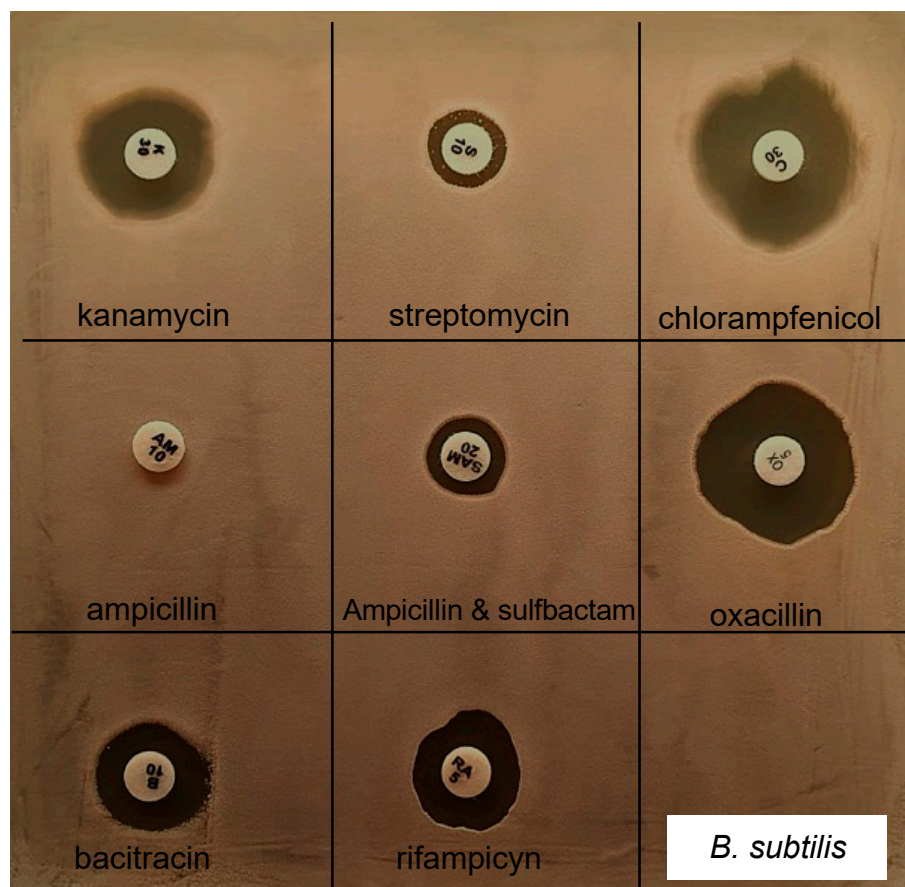

A. Resistance or susceptibility of *B. subtilis* to eight (8) commercial antibiotics discs. Inhibition zone: sensitive, no zone formation: resistant.

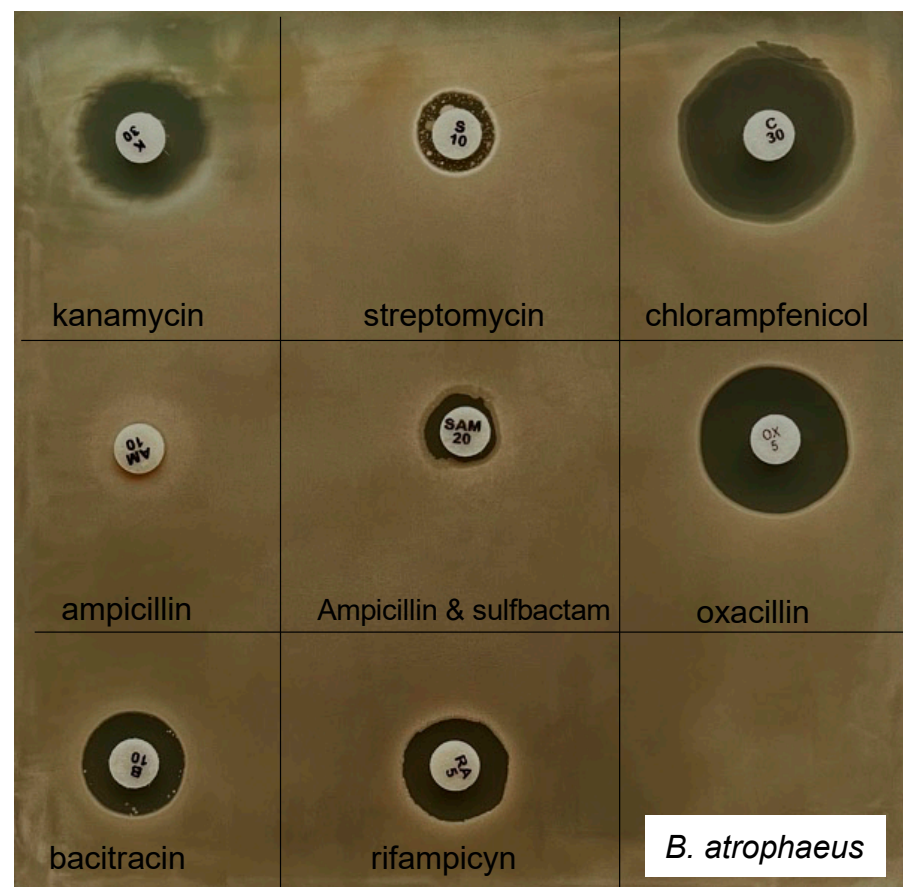

B. Resistance or susceptibility of *B. atrophaeus* to eight (8) commercial antibiotics discs. Inhibition zone: sensitive, no zone formation: resistant.

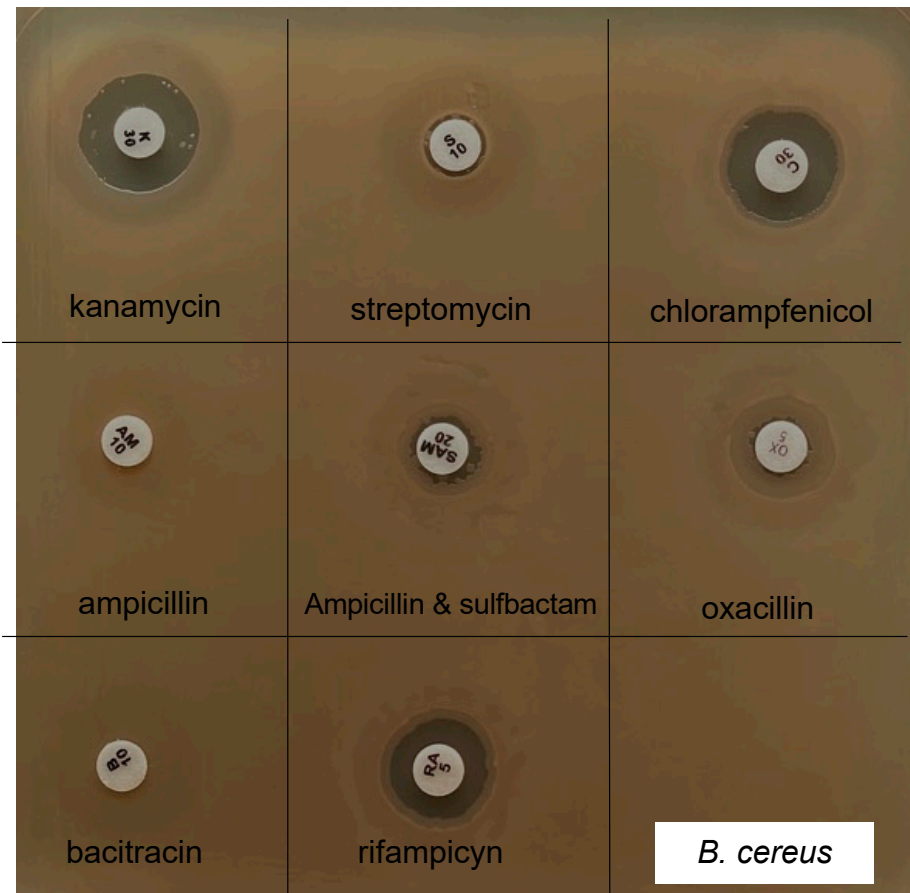

C. Resistance or susceptibility of *B. cereus* to eight (8) commercial antibiotics discs. Inhibition zone: sensitive, no zone formation: resistant.

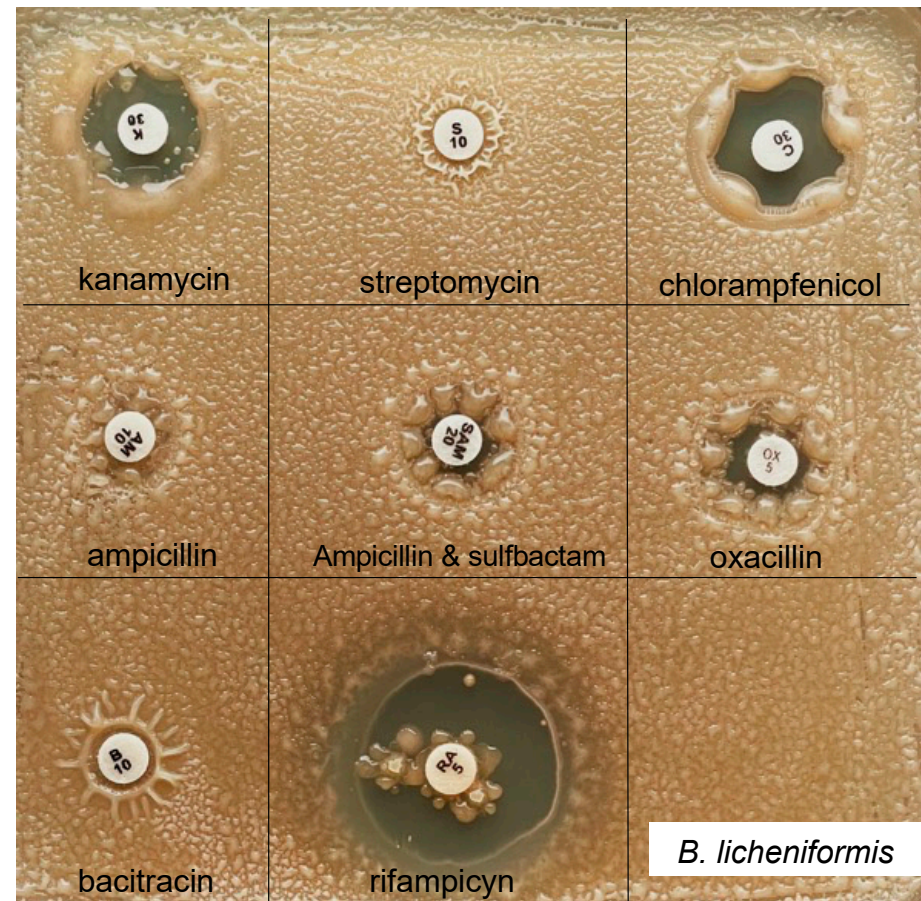

D. Resistance or susceptibility of *B. licheniformis* to eight (8) commercial antibiotics discs. Inhibition zone: sensitive, no zone formation: resistant.



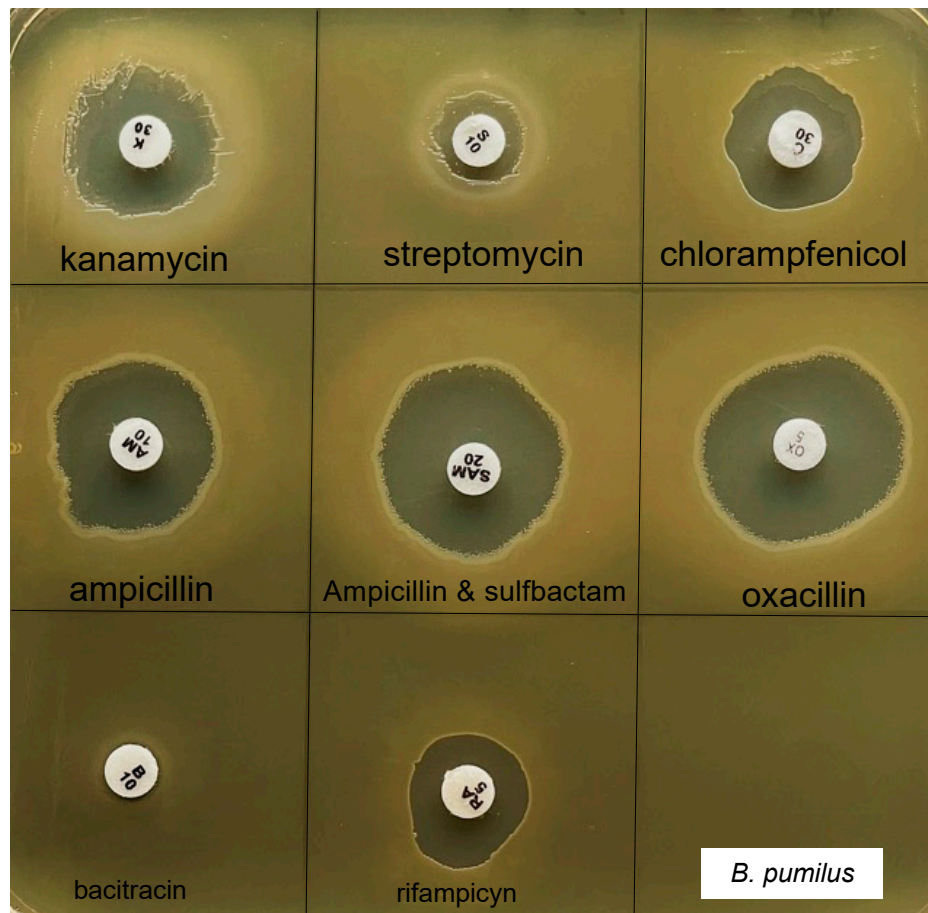

E. Resistance or susceptibility of *B. pumilus* to eight (8) commercial antibiotics discs. Inhibition zone: sensitive, no zone formation: resistant.

**Figure S5.** Antibiotic sensitivity test of isolated probiotic *Bacillus* derived from the probiotic preparation.
