# Supplementary material for: Analysis of Industrial Bacillus Species as Potential Probiotics for Dietary Supplements
Source: MDPI journal article supplement (doi:10.3390/microorganisms11020488), 2023-02-16
Supplement: s1 [file s1]

Supplementary Figure S2

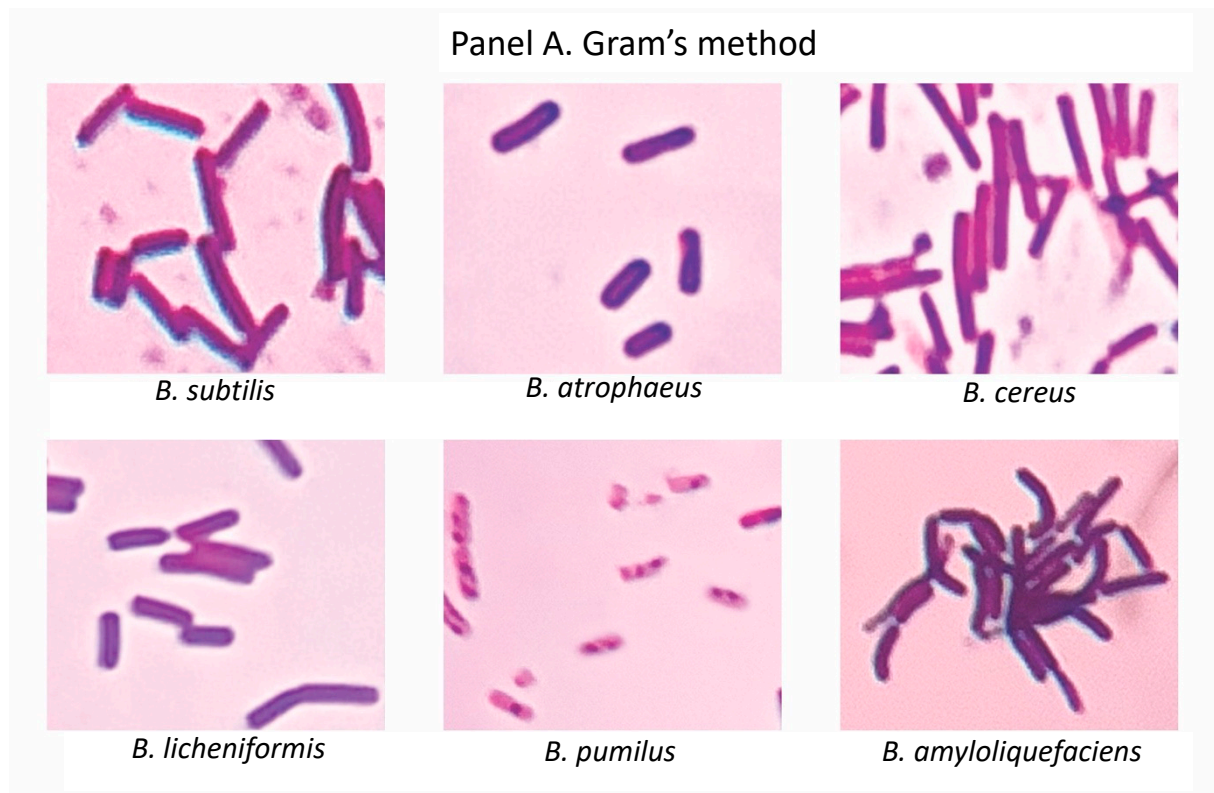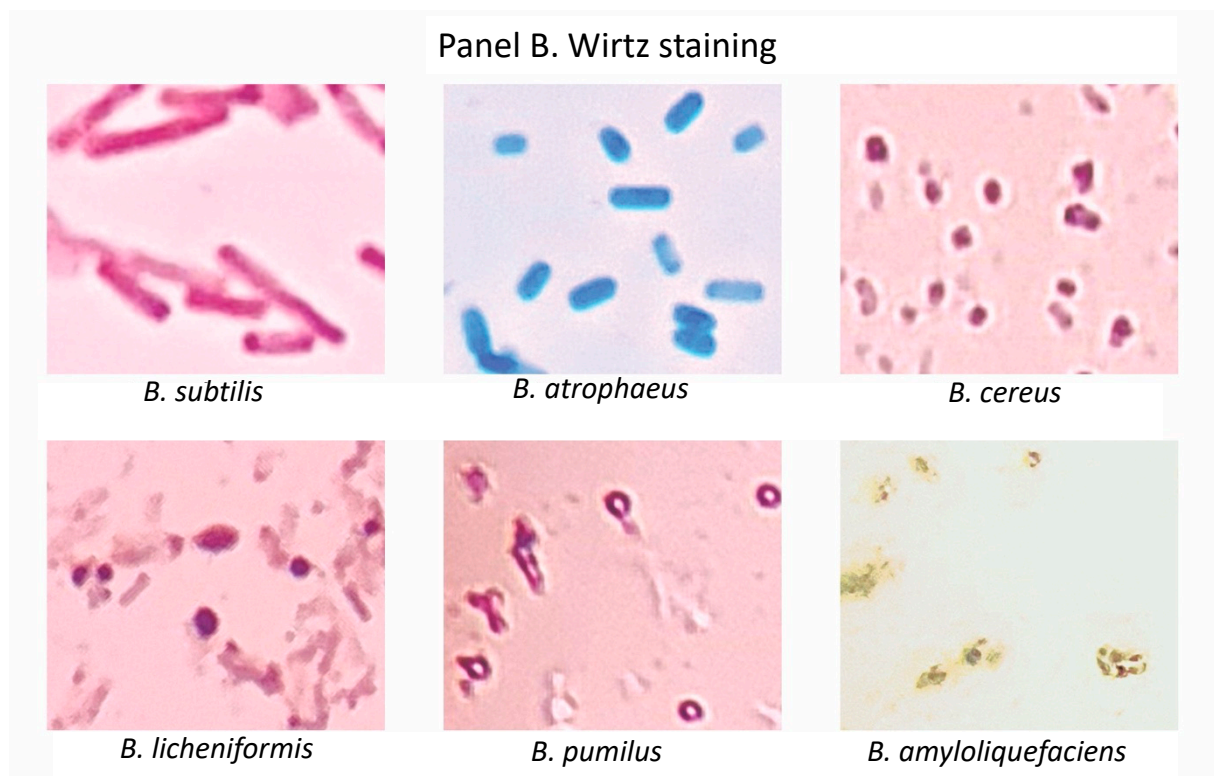

Panel C. Encapsulated *Bacillus* sp. stained using Maneval's envelope staining

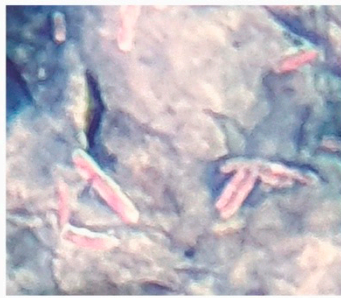

*B. subtilis*

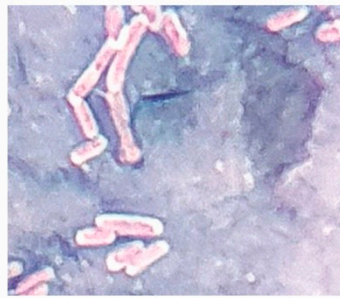

*B. atrophaeus*

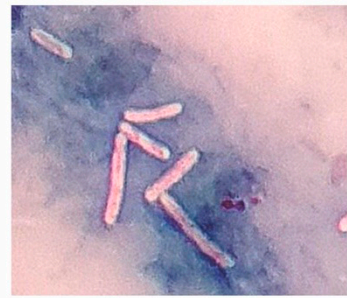

*B. cereus*

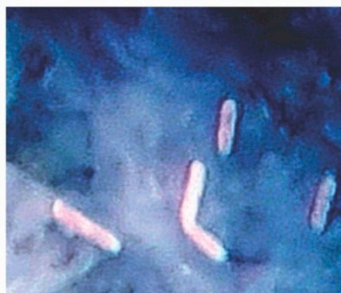

*B. licheniformis*

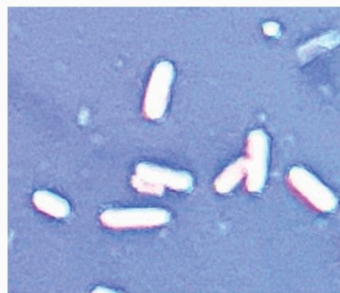

*B. pumilus*

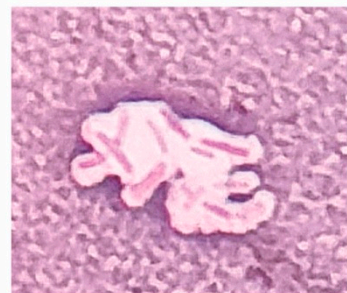

*B. amyloliquefaciens*

**Figure S2.** Microscopic analyses of *Bacillus* species cells by Gram staining (panel A), Wirtz staining (panel B) and Maneval tests (panel C)
