# Supplementary material for: Analysis of Industrial Bacillus Species as Potential Probiotics for Dietary Supplements
Source: MDPI journal article supplement (doi:10.3390/microorganisms11020488), 2023-02-16
Supplement: s1 [file s1]

**Supplementary Figure S4**

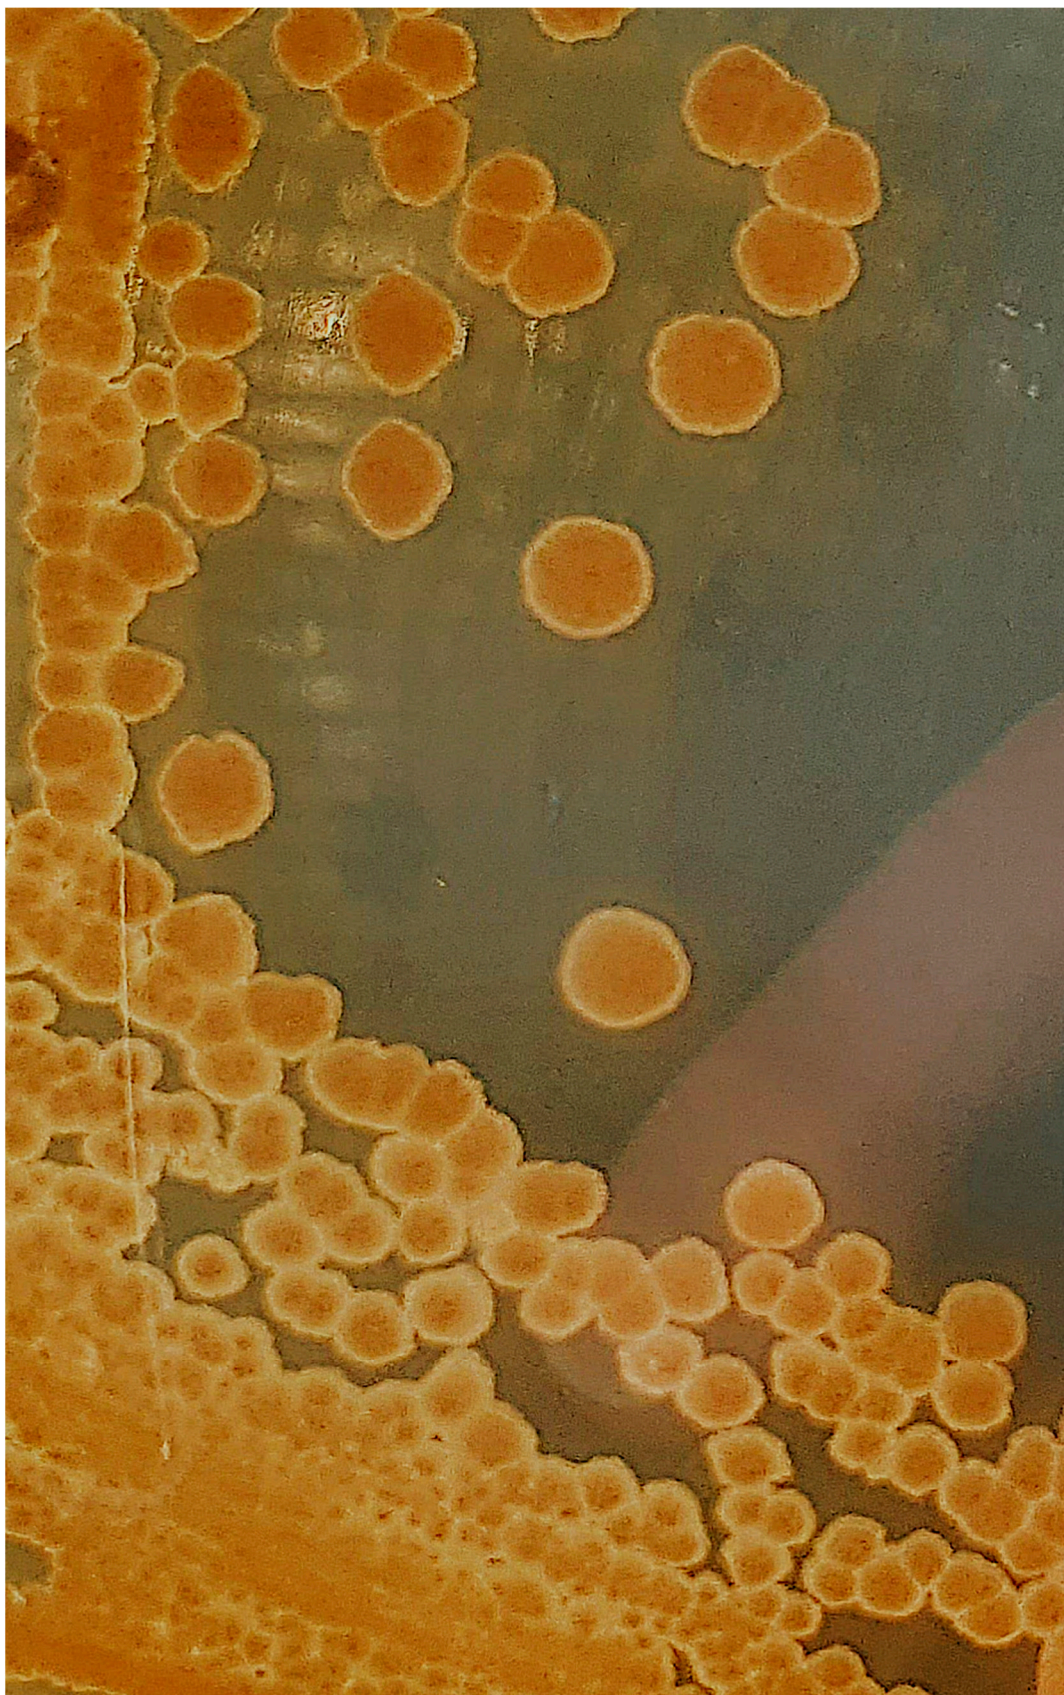

**Figure S4.** Colonies of *B. amyloliquefaciens* with a yellow biofilm secreted into the agar medium.
