# Supplementary material for: Analysis of Industrial Bacillus Species as Potential Probiotics for Dietary Supplements
Source: MDPI journal article supplement (doi:10.3390/microorganisms11020488), 2023-02-16
Supplement: s1 [file s1]

### Supplementary Figure S3

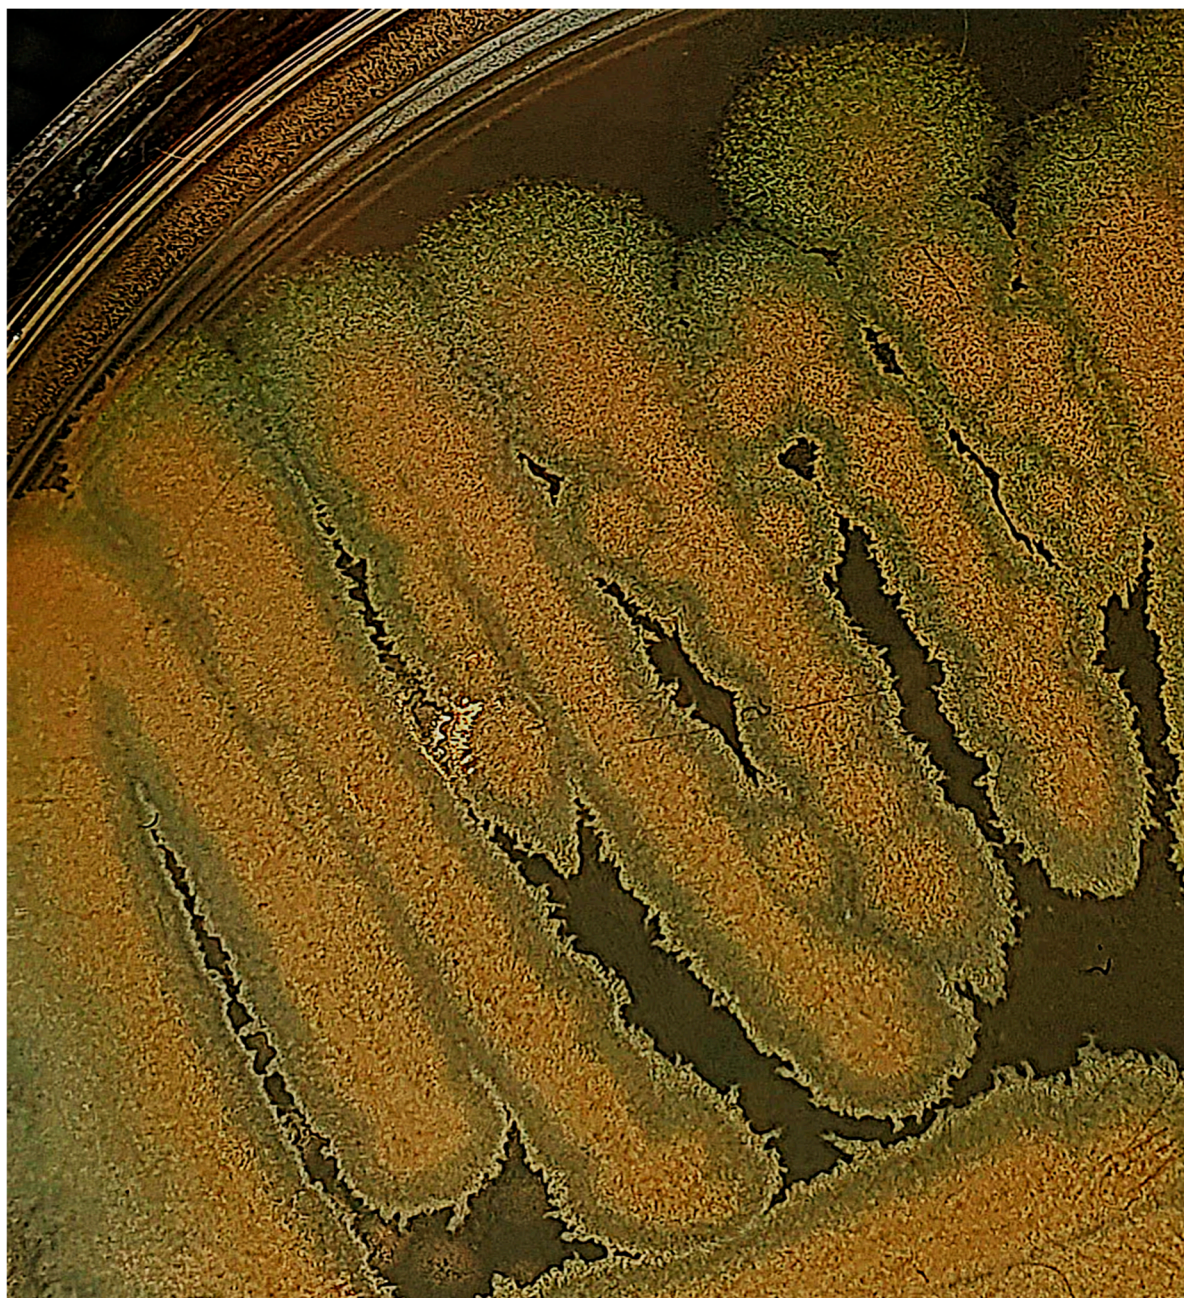

**Figure S3.** The colony of *B. cereus* with a wide zone of hemolysis after incubated in temperature 45°C.
