# Supplementary material for: Analysis of Industrial Bacillus Species as Potential Probiotics for Dietary Supplements
Source: MDPI journal article supplement (doi:10.3390/microorganisms11020488), 2023-02-16
Supplement: s1 [file s1]

## Supplementary Table S3

**Table S3.** Zone of inhibition growth of the *Bacillus sp.* derived from probiotic

| <i>Bacillus sp.</i>         | Antibiotics |            |            |            |            |            |            |            |
|-----------------------------|-------------|------------|------------|------------|------------|------------|------------|------------|
|                             | K           | S          | C          | AM         | SAM        | OX         | B          | RA         |
| <i>B. subtilis</i>          | 14.8 ± 0.3  | 10.7 ± 5.0 | 20.2 ± 0.3 | 0.0 ± 0.0  | 10.7 ± 0.6 | 20.2 ± 0.3 | 12.7 ± 0.6 | 12.8 ± 0.3 |
| <i>B. atropheus</i>         | 13.7 ± 0.6  | 8.8 ± 4.0  | 22.8 ± 0.3 | 0.0 ± 0.0  | 4.5 ± 2.3  | 17.3 ± 0.3 | 10.7 ± 1.9 | 13.0 ± 0.9 |
| <i>B. cereus</i>            | 15.5 ± 0.9  | 7.3 ± 0.6  | 13.8 ± 0.3 | 0.0 ± 0.0  | 8.0 ± 2.0  | 4.0 ± 1.7  | 0.0 ± 0.0  | 12.8 ± 0.3 |
| <i>B. licheniformis</i>     | 14.0 ± 1.5  | 0.0 ± 0.0  | 14.2 ± 0.3 | 0.0 ± 0.0  | 6.7 ± 2.3  | 8.3 ± 1.5  | 0.0 ± 0.0  | 23.3 ± 1.5 |
| <i>B. pumilus</i>           | 17.2 ± 1.0  | 9.5 ± 0.5  | 16.8 ± 0.3 | 20.1 ± 0.1 | 21.7 ± 0.6 | 22.8 ± 0.3 | 0.0 ± 0.0  | 13.8 ± 0.3 |
| <i>B. amyloliquefaciens</i> | -           | -          | -          | -          | -          | -          | -          | -          |

Results are shown as inhibition diameter of growth of *Bacillus* (in mm) for triplicate samples, with the standard deviation and at a significance level of  $P < 0.05$ . Antibiotics discs were as follows: K- kanamycin (30 µg), AM- ampicillin (10 µg), SAM- ampicillin & sulfbactam (20 µg), S- streptomycin (10 µg), RA- rifampicin (5 µg), OX-oxacillin (5 µg), B- bacitracin (10 µg), and C- chloramphenicol (30 µg).
