# Supplementary material for: Analysis of Industrial Bacillus Species as Potential Probiotics for Dietary Supplements
Source: MDPI journal article supplement (doi:10.3390/microorganisms11020488), 2023-02-16
Supplement: s1 [file s1]

## Supplementary Table S1

**Table S1.** Quantification of bacterial species in the temperature range tested

| Temperature                                                                            | 37°C                                                              | 40°C                                                                                      | 45°C                                                                                                                                          | 48°C                                                                  | 51°C                                                                  | 54°C                                       | 57°C       |
|----------------------------------------------------------------------------------------|-------------------------------------------------------------------|-------------------------------------------------------------------------------------------|-----------------------------------------------------------------------------------------------------------------------------------------------|-----------------------------------------------------------------------|-----------------------------------------------------------------------|--------------------------------------------|------------|
| <b>Number of bacteria species detected</b>                                             | 3                                                                 | 4                                                                                         | 6                                                                                                                                             | 3                                                                     | 3                                                                     | 2                                          | 0          |
| <b><i>Bacillus</i> strains identified MALDI-TOF MS method</b>                          | <i>B. subtilis</i><br><i>B. cereus</i><br><i>B. licheniformis</i> | <i>B. subtilis</i><br><i>B. atrophaeus</i><br><i>B. cereus</i><br><i>B. licheniformis</i> | <i>B. subtilis</i><br><i>B. atrophaeus</i><br><i>B. cereus</i><br><i>B. licheniformis</i><br><i>B. pumilus</i><br><i>B. amyloliquefaciens</i> | <i>B. subtilis</i><br><br><i>B. cereus</i><br><i>B. licheniformis</i> | <i>B. subtilis</i><br><br><i>B. cereus</i><br><i>B. licheniformis</i> | <i>B. subtilis</i><br><br><i>B. cereus</i> | No strains |
| <b>Total number of bacteria counted on the plate with the dilution 10<sup>-7</sup></b> | 147                                                               | 185                                                                                       | 93                                                                                                                                            | 130                                                                   | 67                                                                    | 239                                        | 0          |
