# Supplementary material for: Analysis of Industrial Bacillus Species as Potential Probiotics for Dietary Supplements
Source: MDPI journal article supplement (doi:10.3390/microorganisms11020488), 2023-02-16
Supplement: s1 [file s1]

## Supplementary Table S2

**Table S2.** The antagonistic activity of CFS from the *Bacillus* strains against foodborne pathogenic bacteria

| <i>Bacillus sp.</i>         | % Inhibition of foodborne pathogenic after 24h |                               |                              |
|-----------------------------|------------------------------------------------|-------------------------------|------------------------------|
|                             | <i>Escherichia coli</i>                        | <i>Salmonella Enteritidis</i> | <i>Staphylococcus aureus</i> |
| <i>B. subtilis</i>          | 46.9 ± 0.04                                    | 56.0 ± 0.01                   | 52.3 ± 0.02                  |
| <i>B. atrophaeus</i>        | 54.8 ± 0.03                                    | 59.0 ± 0.02                   | 58.2 ± 0.02                  |
| <i>B. cereus</i>            | 31.0 ± 0.02                                    | 32.1 ± 0.01                   | 30.7 ± 0.01                  |
| <i>B. licheniformis</i>     | 18.9 ± 0.03                                    | 35.3 ± 0.03                   | 24.5 ± 0.02                  |
| <i>B. pumilus</i>           | 50.9 ± 0.03                                    | 50.9 ± 0.02                   | 46.9 ± 0.01                  |
| <i>B. amyloliquefaciens</i> | 45.9 ± 0.02                                    | 54.9 ± 0.01                   | 47.1 ± 0.04                  |
