# Supplementary figures and images for: Analysis of Industrial Bacillus Species as Potential Probiotics for Dietary Supplements
Source: MDPI journal article supplement (doi:10.3390/microorganisms11020488), 2023-02-16

**Supplementary Figure S1**

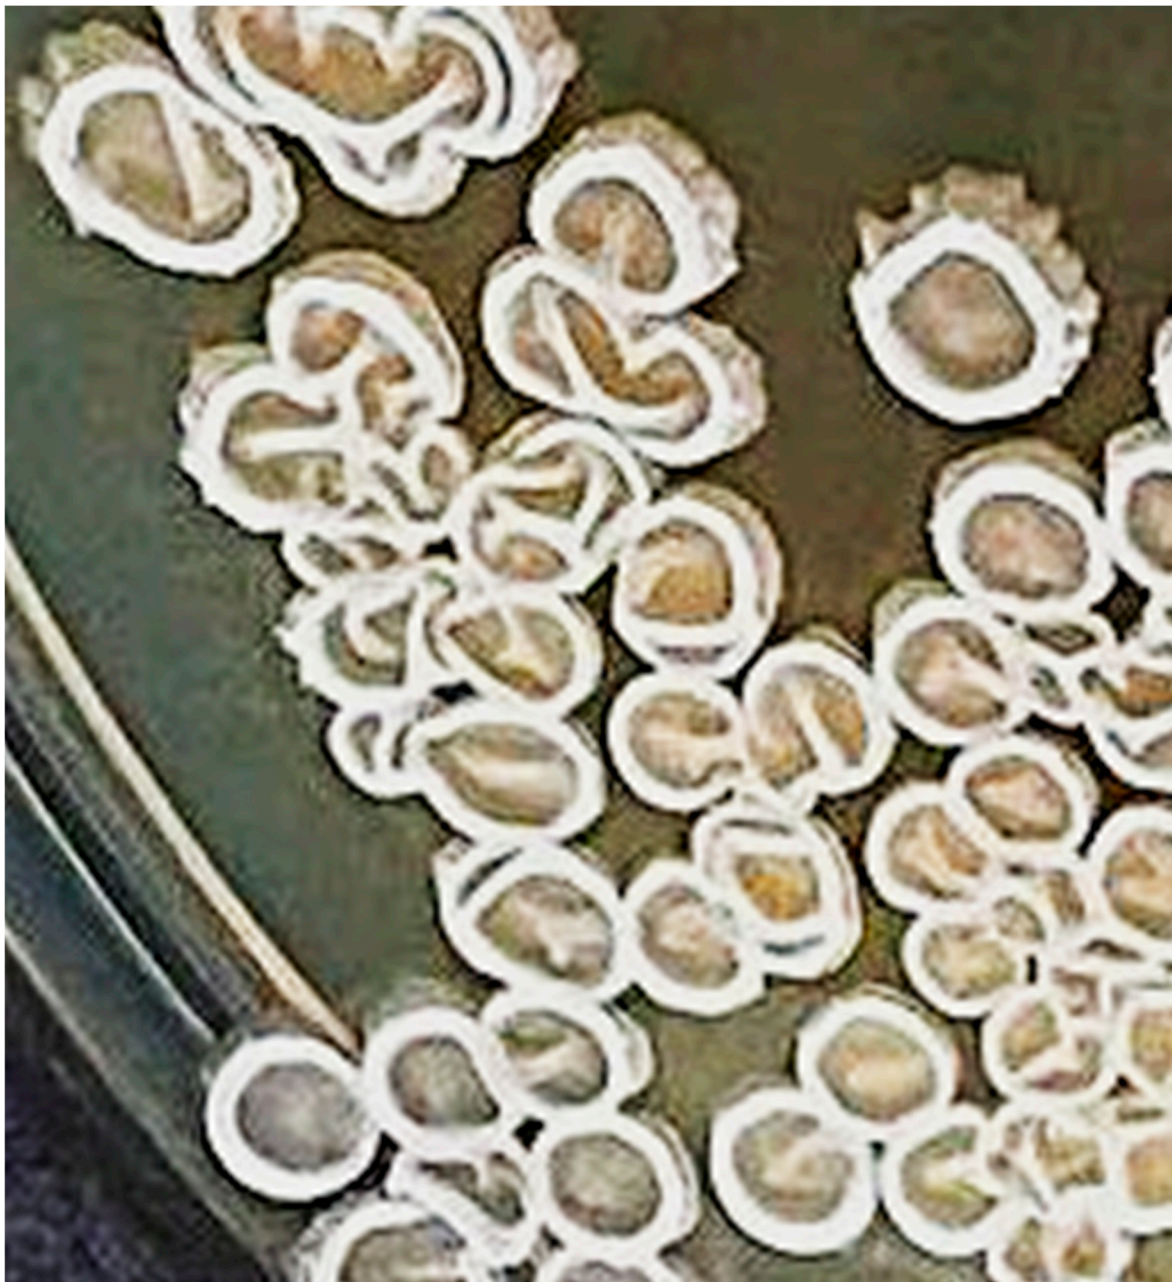

**Figure S1.** Growth of *B. subtilis* on agar plate in 54°C

Supplement: s1 [file s1]
